# Supplementary material for: On standardization of controls in lifespan studies
Source: publisher site journal article supplement (doi:10.18632/aging.205604), 2024-02-27
Supplement: Supplementary file [file aging-v16i4-205604-supplementary-material-SD3.pdf]

## SUPPLEMENTARY TABLE

Supplementary Table 1. Characteristics of datasets from figure 1 of the main text.

|                                | <i>n</i> | Mean surv time | 5% Surv time | Median surv time | 95% Surv time |
|--------------------------------|----------|----------------|--------------|------------------|---------------|
| -curcumin                      | 50       | 830            | 1033         | 823              | 580           |
| +curcumin                      | 50       | 882            | 1033         | 882              | 640           |
| -berberine                     | 22       | 605            | 709          | 598              | 446           |
| +berberine                     | 22       | 661            | 755          | 693              | 527           |
| -SIRT6                         | 52       | 753            | 1051         | 745              | 392           |
| +SIRT6                         | 51       | 911            | 1105         | 937              | 647           |
| -rapamycin                     | 18       | 938            | 1234         | 927              | 679           |
| +rapamycin                     | 17       | 1087           | 1401         | 1082             | 807           |
| PMID: <a href="#">28877458</a> | 61       | 879            | 1088         | 901              | 474           |
| PMID: <a href="#">24409289</a> | 40       | 815            | 1020         | 804              | 558           |
| PMID: <a href="#">28877457</a> | 43       | 903            | 1103         | 884              | 696           |
| PMID: <a href="#">32877690</a> | 24       | 969            | 1112         | 971              | 826           |
| PMID: <a href="#">32934233</a> | 24       | 944            | 1135         | 952              | 714           |
| PMID: <a href="#">20370440</a> | 54       | 769            | 1006         | 783              | 445           |
| PMID: <a href="#">35511946</a> | 43       | 795            | 1067         | 818              | 548           |
